# Supplementary material
Source: PubMed Central journal article supplement (PMC3479513)
Supplement: 1206851109_pnas.201206851SI.pdf [file 1206851109_pnas.201206851SI.pdf]

# Supporting Information

Biniek et al. 10.1073/pnas.1206851109

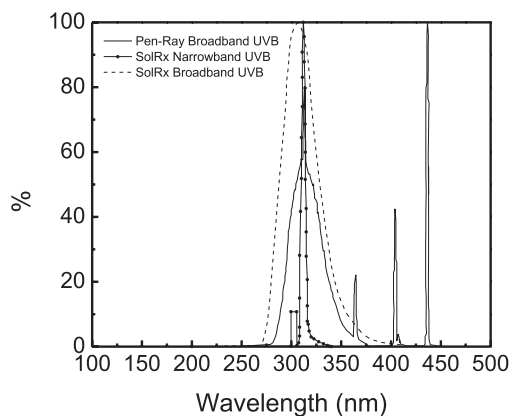

Fig. S1. Spectral output of light sources.

Table S1. Summary of parameters

| Parameter     | Units            | Meaning                                                                                                                                                    |
|---------------|------------------|------------------------------------------------------------------------------------------------------------------------------------------------------------|
| $\sigma_{SC}$ | MPa              | The mechanical stress in the plane of the SC tissue.                                                                                                       |
| $E_{SC}$      | GPa              | The elastic "stiffness" of the tissue.                                                                                                                     |
| $G$           | J/m <sup>2</sup> | The driving "force" from mechanical stress to cause crack propagation.                                                                                     |
| $G_C$         | J/m <sup>2</sup> | The "resistance" of the material or tissue to crack propagation. When the mechanical stress is sufficiently large, $G = G_C$ and crack propagation occurs. |
